# Supplementary material for: Glutamate drives ‘local Ca2+ release’ in cardiac pacemaker cells
Source: PubMed Central journal article supplement (PMC9437105; doi:10.1038/s41422-022-00693-z), 2022-07-15
Supplement: 41422_2022_693_MOESM1_ESM.pdf [file 41422_2022_693_MOESM1_ESM.pdf]

## Supplementary Figures

Fig. S1

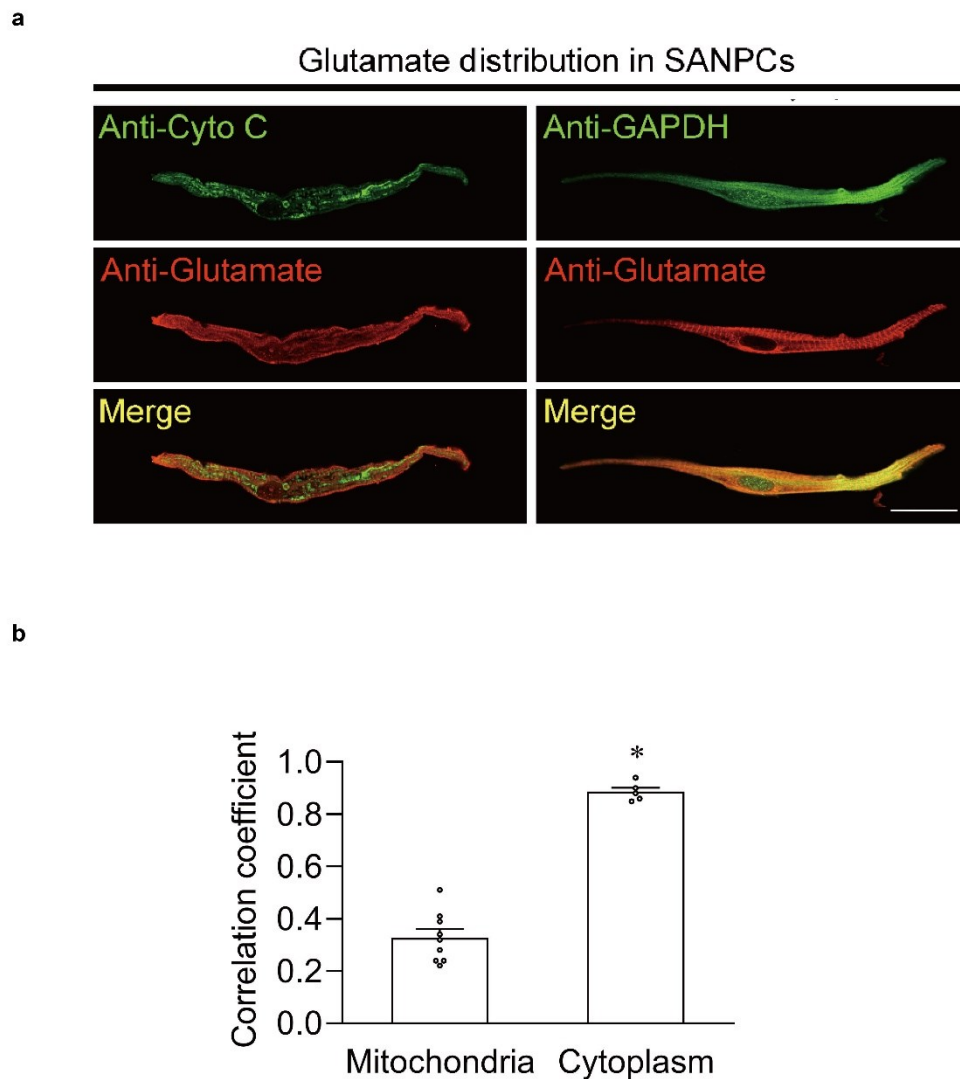

**Fig. S1. Glutamate was more present in the cytoplasm than in the mitochondria in rat SANPCs.**

**a** Immunofluorescence staining with anti-glutamate, anti-Cytochrome C (mitochondrial marker) and anti-GAPDH (cytoplasmic marker) antibodies in isolated SANPCs. Scale bar = 20  $\mu\text{m}$ . **b** Quantification of the colocalization of glutamate with Cytochrome C or GAPDH (n = 5-9 per group; \*  $p < 0.05$ ,  $p$  values were calculated by unpaired Student's  $t$ -test). Cyto C, cytochrome C.
