# Supplementary material for: Glutamate drives ‘local Ca2+ release’ in cardiac pacemaker cells
Source: PubMed Central journal article supplement (PMC9437105; doi:10.1038/s41422-022-00693-z), 2022-07-15
Supplement: 41422_2022_693_MOESM2_ESM.pdf [file 41422_2022_693_MOESM2_ESM.pdf]

Fig. S2

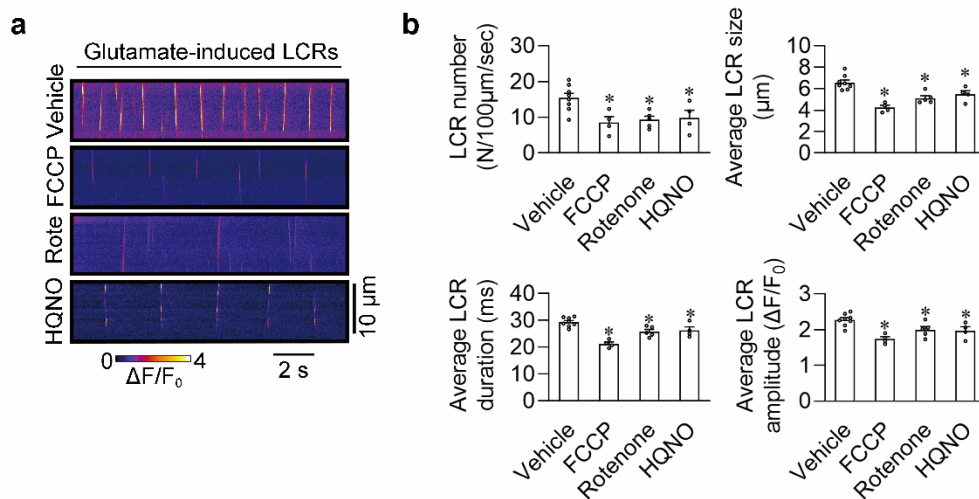

**Fig. S2. Glutamate-induced mitochondrial ROS increase mediated the LCR enhancement in rat SANPCs.**

**a** Representative confocal line-scan images of LCR events in 5 mM glutamate-treated, permeabilized SANPCs treated with vehicle or 10  $\mu$ M FCCP, 10  $\mu$ M Rotenone or 10  $\mu$ M HQNO. **b** Pooled data from **a** (n = 4-8 cells per group, cells were isolated from at least 4 rats; \*  $p < 0.05$ ,  $p$  values were calculated by one-way ANOVA with Dunnett post-hoc test). Rote, Rotenone.
