# Supplementary material for: Glutamate drives ‘local Ca2+ release’ in cardiac pacemaker cells
Source: PubMed Central journal article supplement (PMC9437105; doi:10.1038/s41422-022-00693-z), 2022-07-15
Supplement: 41422_2022_693_MOESM3_ESM.pdf [file 41422_2022_693_MOESM3_ESM.pdf]

**Fig. S3**

**a**

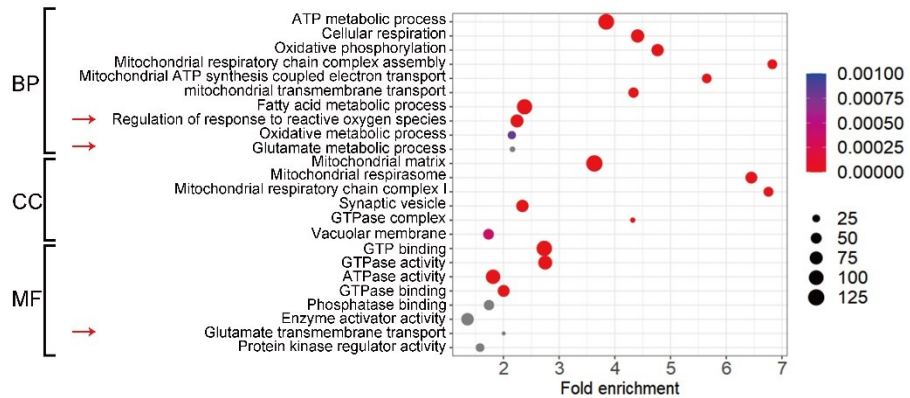

**b**

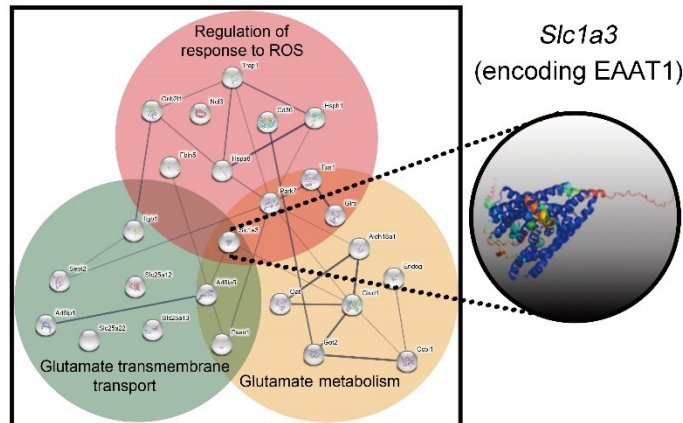

**Fig. S3. Identification of the glutamate transporter EAAT1 in rat SANPC mitochondria.**

**a** Gene ontology analysis of SANPC mitochondria. The significantly enriched pathways involving the glutamate metabolism and reactive oxygen species were indicated (red arrows). **b** Protein-protein interaction (PPI) network of SANPC mitochondrial proteins built using STRING. The analysis highlighted the expression of EAAT1 in SANPC mitochondria. BP, Biological Process; CC, Cellular Component; MF, Molecular Function.
