# Supplementary material for: Glutamate drives ‘local Ca2+ release’ in cardiac pacemaker cells
Source: PubMed Central journal article supplement (PMC9437105; doi:10.1038/s41422-022-00693-z), 2022-07-15
Supplement: 41422_2022_693_MOESM4_ESM.pdf [file 41422_2022_693_MOESM4_ESM.pdf]

Fig. S4

a

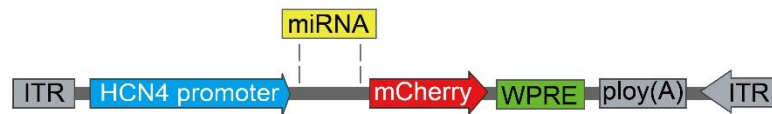

b

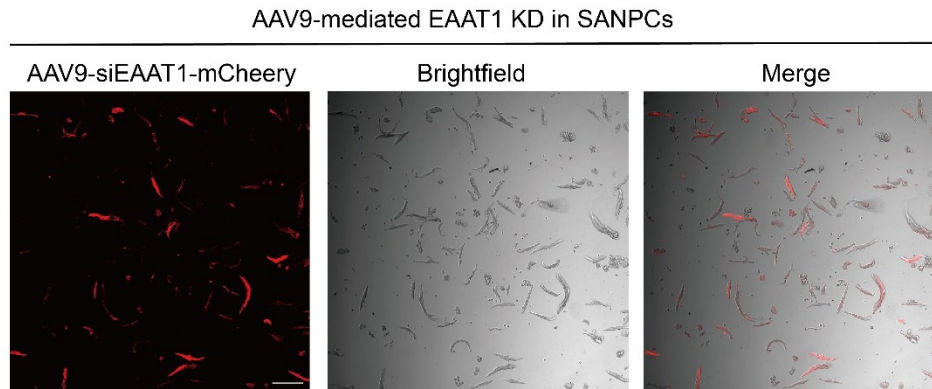

c

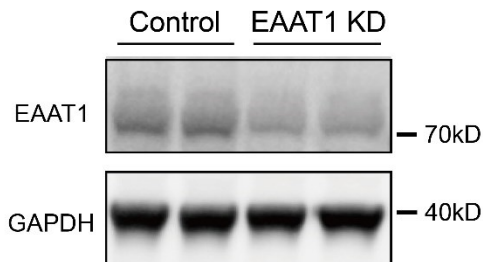

d

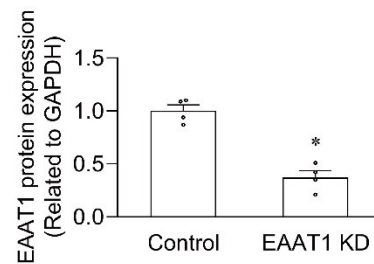

**Fig. S4. The efficiency of EAAT1 knockdown by adeno-associated virus-9 (AAV9)-based strategy.**

**a** Schematic diagram showed the construction of AAV9 virus under the control of HCN4 promoter. **b** Fluorescence imaging of SANPCs isolated from mice 2 weeks after AAV9 virus injection. Scale bar = 100  $\mu$ m. **c** Representative western blot bands showed the efficiency of EAAT1 knockdown (EAAT1 KD) by AAV9-siEAAT1 in mice. **d** Quantitative analysis for **c** (n = 4; \*  $p < 0.05$ ,  $p$  values were calculated by unpaired Student's  $t$ -test).
