# Supplementary material for: Glutamate drives ‘local Ca2+ release’ in cardiac pacemaker cells
Source: PubMed Central journal article supplement (PMC9437105; doi:10.1038/s41422-022-00693-z), 2022-07-15
Supplement: 41422_2022_693_MOESM5_ESM.pdf [file 41422_2022_693_MOESM5_ESM.pdf]

**Fig. S5**

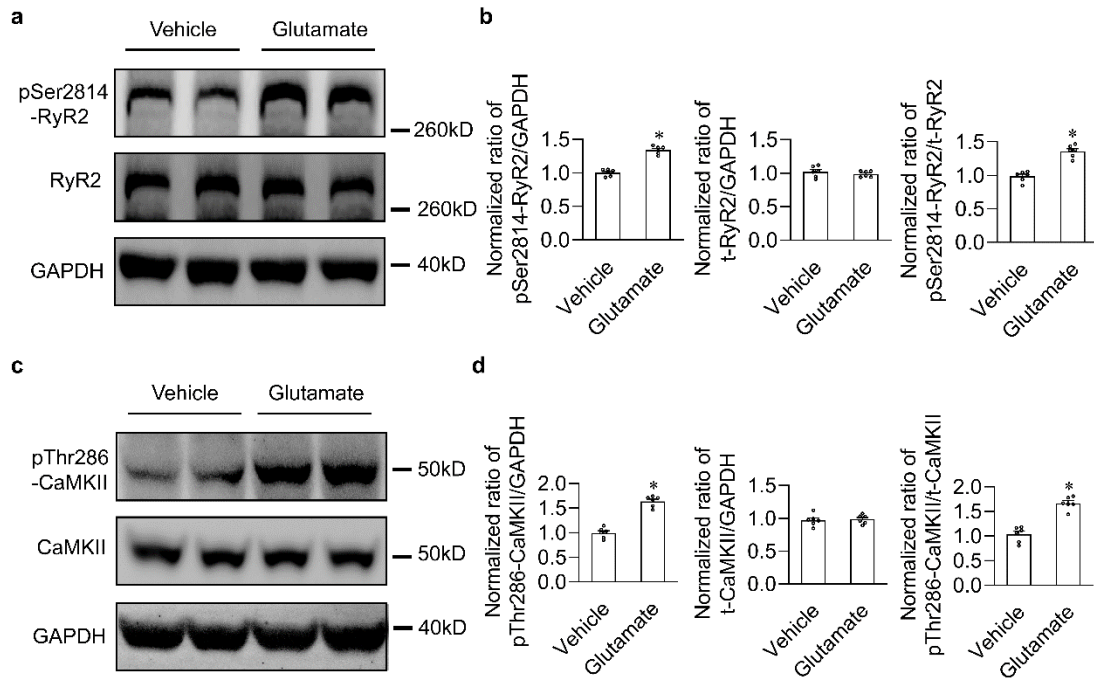

**Fig. S5. Glutamate increased the phosphorylation of Ca<sup>2+</sup>-handling proteins in rat SANPCs.**

**a-b** Western blot showing that increased phosphorylation of RyR2 (Ser-2814) in SANPCs with 5 mM glutamate treatment. **a** Representative western blot bands. **b** Pooled data from **a**. n = 6 per group. **c-d** Western blot showing that increased phosphorylation of CaMK II (Thr-286) in SANPCs with glutamate treatment. **c** Representative western blot bands. **d** Pooled data from **c**. n = 6 per group. \*  $p < 0.05$ ,  $p$  values were calculated by unpaired Student's  $t$ -test.
