# Supplementary material for: Glutamate drives ‘local Ca2+ release’ in cardiac pacemaker cells
Source: PubMed Central journal article supplement (PMC9437105; doi:10.1038/s41422-022-00693-z), 2022-07-15
Supplement: 41422_2022_693_MOESM6_ESM.pdf [file 41422_2022_693_MOESM6_ESM.pdf]

Fig. S6

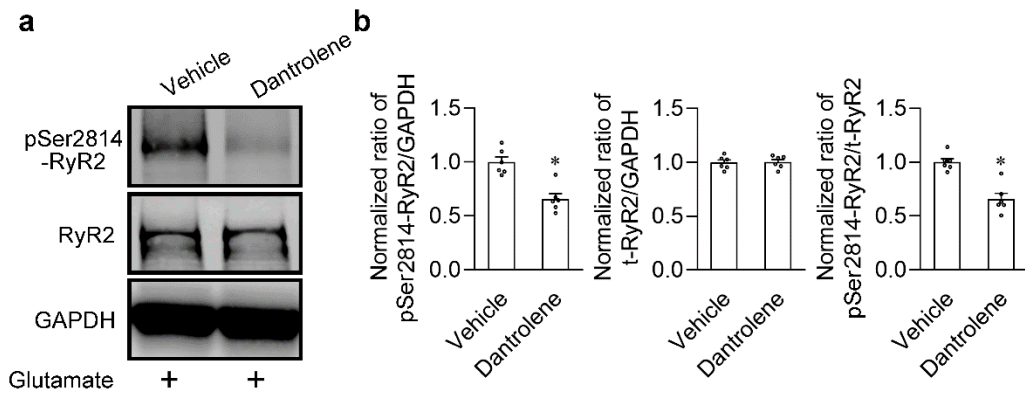

**Fig. S6. Dantrolene decreased the glutamate-induced RyR2 phosphorylation in rat SANPCs.**

Western blot showing that glutamate-induced RyR2 phosphorylation (Ser-2814) was decreased by 10  $\mu$ M Dantrolene in SANPCs. **a** Representative western blot bands. **b** Pooled data from **a**.  $n = 6$  per group. \*  $p < 0.05$ , calculated by unpaired Student's  $t$ -test. t-RyR2, total RyR2.
