# Supplementary material for: Glutamate drives ‘local Ca2+ release’ in cardiac pacemaker cells
Source: PubMed Central journal article supplement (PMC9437105; doi:10.1038/s41422-022-00693-z), 2022-07-15
Supplement: 41422_2022_693_MOESM8_ESM.pdf [file 41422_2022_693_MOESM8_ESM.pdf]

## **Supplementary Video Legend**

**Video S1.** Video of the synchronously recording for glutamate accumulation (green) and LCR events (red) in single SANPC.
